# Supplementary material
Source: publisher figshare collection journal article supplement (https://karger.figshare.com/articles/dataset/_/21269862)
Supplement: Supplementary file 1 [file 1]

**Supplement Table 4.**

*Inferential statistics for simple moderation and moderated-moderation models of symptoms associated with environmental factor subscales (ESAS-subscales) (N=294).*

|  | ESAS-Building | | | | | ESAS-Odour | | | | |
| --- | --- | --- | --- | --- | --- | --- | --- | --- | --- | --- |
| Model  Predictors | *b* | *SE* | *t* | *p* | *sr*2 | *b* | *SE* | *t* | *p* | *sr*2 |
| BSS-C × TEC | *F*(3,290)=11.52 *p* < .001, *R2*=.12, BIC=567.21 | | | | | *F*(3,290)=7.34 *p* < .001, *R2*=.10, BIC=555.08 | | | | |
| BSS-C | 0.24 | 0.05 | 5.11 | <.001 | .08 | 0.16 | 0.05 | 3.58 | <.001 | .04 |
| TEC | 0.06 | 0.05 | 1.41 | .16 | .01 | 0.13 | 0.05 | 2.62 | .009 | .02 |
| BSS-C × TEC | 0.04 | 0.06 | 0.72 | .47 | .00 | -0.03 | 0.06 | -0.53 | .60 | .00 |
| BSS-C × DES-II | *F*(3,290)= 11.10, *p* < .001, *R2*= .13, 564.34 | | | | | *F*(3,290)= 7.55, *p* < .001, *R2*= .09, BIC=554.17 | | | | |
| BSS-C | 0.22 | 0.05 | 4.53 | <.001 | .06 | 0.14 | 0.05 | 3.00 | .002 | .03 |
| DES-II | 0.11 | 0.05 | 2.30 | .022 | .02 | 0.14 | 0.04 | 3.20 | .001 | .03 |
| BSS-C × DES-II | 0.01 | 0.06 | 0.09 | .93 | .00 | -0.03 | 0.06 | -0.57 | .57 | .00 |
| TEC × DES-II | *F*(3,290)=6.96, *p* < .001, *R2*=.06, BIC=584.89 | | | | | *F*(3,290)=12.64, *p* < .001, *R2*=.10, BIC=552.59 | | | | |
| TEC | 0.04 | 0.05 | 0.82 | .41 | .00 | 0.10 | 0.06 | 1.81 | .07 | .01 |
| DES-II | 0.71 | 0.05 | 3.26 | .001 | .03 | 0.16 | 0.05 | 2.98 | .003 | .03 |
| TEC × DES-II | 0.13 | 0.06 | 2.31 | .021 | .02 | 0.18 | 0.06 | 3.13 | .002 | .03 |
| BSS-C ×DES-II × TEC | *F*(7,286)=5.99, *p* < .001, *R2*=.15, BIC=580.26 | | | | | *F*(7,286)=6.15, *p* < .001, *R2*=.14, BIC=560.21 | | | | |
| BSS-C | 0.23 | 0.05 | 4.37 | <.001 | .06 | 0.16 | 0.05 | 2.95 | .003 | .03 |
| DES-II | 0.10 | 0.05 | 1.95 | .05 | .01 | 0.11 | 0.05 | 2.15 | .032 | .01 |
| BSS-C ×DES-II | -0.01 | 0.06 | -0.23 | .82 | .00 | -0.04 | 0.07 | -0.57 | .57 | .00 |
| TEC | 0.44 | 0.05 | 0.88 | .38 | .00 | 0.11 | 0.06 | 1.94 | .053 | .01 |
| BSS-C × TEC | 0.03 | 0.06 | 0.49 | .63 | .00 | -0.05 | 0.07 | -0.63 | .53 | .00 |
| DES-II × TEC | 0.14 | 0.06 | 2.33 | .02 | .02 | 0.20 | 0.06 | 3.29 | .001 | .03 |
| BSS-C ×DES-II × TEC | -0.05 | 0.09 | -0.56 | .58 | .00 | -0.08 | 0.10 | -0.80 | .43 | .00 |

*Notes*. ESAS=*Environmental Symptom Attribution Scale*; BSS-C=*Brief Suggestibility Scale-Composite*; DES-II=*Dissociative Experiences Scale-II*; TEC=*Traumatic Experience Checklist*
